# Supplementary material
Source: publisher site journal article supplement (https://www.dovepress.com/article/454446)
Supplement: Supplementary file 1 [file get_supplementary_file.php]

**Supplementary Figure 1** Boxplot of sample microarray data homogenisation process.


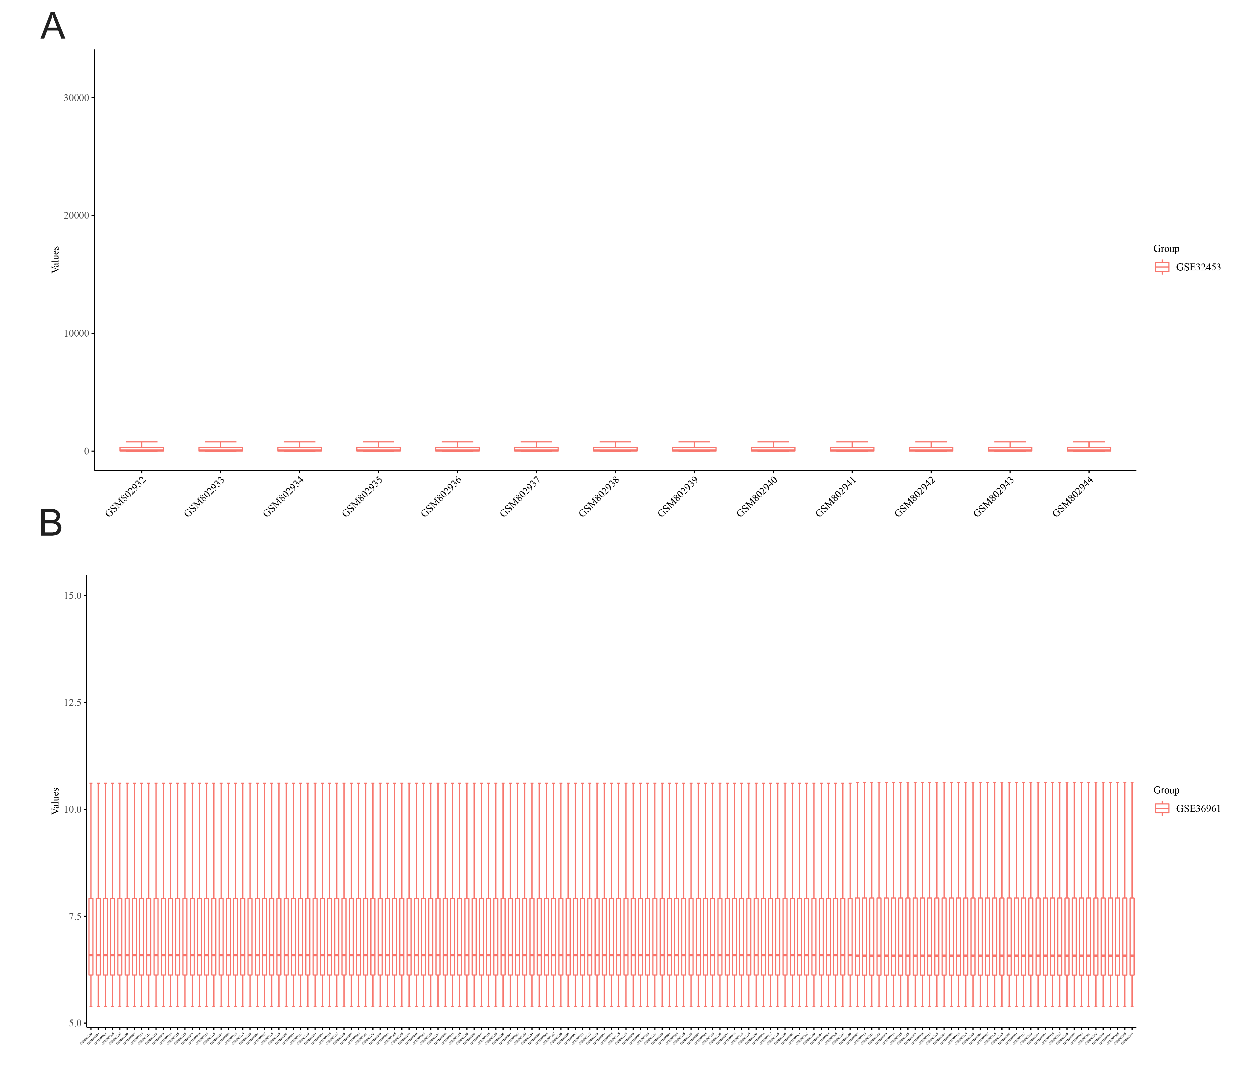


**A** Boxplot of processed GSE32453 dataset. **B** Boxplot of processed GSE36961 dataset.

**Supplementary Figure 2** Establishment of myocardial hypertrophy model.


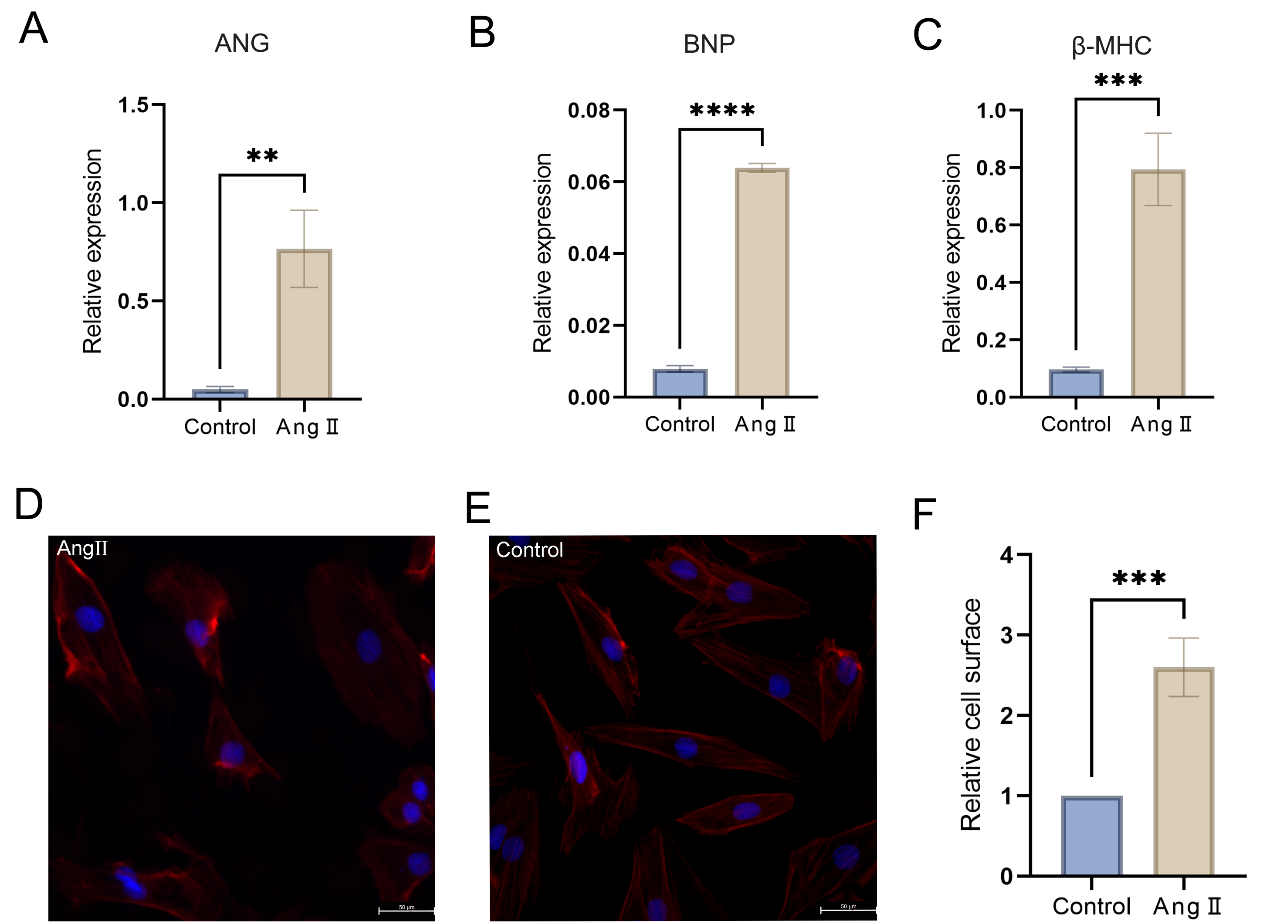


**A** Expression of ANG mRNA. **B** Expression of BNP mRNA. **C** Expression of β-MHC mRNA. **D** Fluorescence staining of Ang II-induced hypertrophy in H9c2 cells. **E** Fluorescent staining of H9c2 cells from normal control. **F** Relative surface area of cardiomyocytes. (***P*<0.01, ****P*<0.001, *****P*<0.0001)

**Supplementary Table 1**

Immunohistochemical data of eight key genes in the HPA database.

| Gene | URL | Protein Atlas version |
| --- | --- | --- |
| FOS | https://www.proteinatlas.org/ENSG00000170345-FOS/tissue/heart+muscle | Version 23.0 |
| CD86 | https://www.proteinatlas.org/ENSG00000114013-CD86/tissue/heart+muscle | Version 23.0 |
| CD68 | https://www.proteinatlas.org/ENSG00000129226-CD68/tissue/heart+muscle | Version 23.0 |
| BDNF | https://www.proteinatlas.org/ENSG00000176697-BDNF/tissue/heart+muscle | Version 23.0 |
| PIK3R1 | https://www.proteinatlas.org/ENSG00000145675-PIK3R1/tissue/heart+muscle | Version 23.0 |
| PLEK | https://www.proteinatlas.org/ENSG00000115956-PLEK/tissue/heart+muscle | Version 23.0 |
| RAC2 | https://www.proteinatlas.org/ENSG00000128340-RAC2/tissue/heart+muscle | Version 23.0 |
| CCL2 | https://www.proteinatlas.org/ENSG00000108691-CCL2/tissue/heart+muscle | Version 23.0 |

HPA database: Human Protein Atlas database; URL: uniform resource locator.

**Supplementary Table 2**

Single-cell transcriptome data of eight key genes in the HPA database.

| Gene | URL | Protein Atlas version |
| --- | --- | --- |
| FOS | https://www.proteinatlas.org/ENSG00000170345-FOS/single+cell+type/heart+muscle | Version 23.0 |
| CD86 | https://www.proteinatlas.org/ENSG00000114013-CD86/single+cell+type/heart+muscle | Version 23.0 |
| CD68 | https://www.proteinatlas.org/ENSG00000129226-CD68/single+cell+type/heart+muscle | Version 23.0 |
| BDNF | https://www.proteinatlas.org/ENSG00000176697-BDNF/single+cell+type/heart+muscle | Version 23.0 |
| PIK3R1 | https://www.proteinatlas.org/ENSG00000145675-PIK3R1/single+cell+type/heart+muscle | Version 23.0 |
| PLEK | https://www.proteinatlas.org/ENSG00000115956-PLEK/single+cell+type/heart+muscle | Version 23.0 |
| RAC2 | https://www.proteinatlas.org/ENSG00000128340-RAC2/single+cell+type/heart+muscle | Version 23.0 |
| CCL2 | https://www.proteinatlas.org/ENSG00000108691-CCL2/single+cell+type/heart+muscle | Version 23.0 |

HPA database: Human Protein Atlas database; URL: uniform resource locator.

**Supplementary Table 3**

| The oligonucleotide sequences of primers used in quantitative real-time PCR. | | |
| --- | --- | --- |
| Gene | Primer type | Sequence/Target sequence |
| ANP | Forward | 5’-AGAGAGTGAGCCGAGACAGC-3’ |
| ANP | Reverse | 5’-GTTGGACACCGCACTGTAT-3’ |
| BNP | Forward | 5’-GACGGGCTGAGGTTGTTTTA-3’ |
| BNP | Reverse | 5’-ACTGTGGCAAGTTTGTGCTG-3’ |
| β-MHC | Forward | 5’-CCTCGCAATATCAAGGGAAA-3’ |
| β-MHC | Reverse | 5’-TACAGGTGCATCAGCTCCAG-3’ |
| FOS | Forward | 5’-CGCAGAGCATTGGCAGGAG-3’ |
| FOS | Reverse | 5’-CCGCTTGGAGTGTATCAGTCAG-3’ |
| CD86 | Forward | 5’-CCTGCTCATCTATACACGGTTACC-3’ |
| CD86 | Reverse | 5’-CGTCGTACAGTTCTGTGACATTATC-3’ |
| CD68 | Forward | 5’-GCCACGGACCCACGACTG-3’ |
| CD68 | Reverse | 5’-GTGCTATTGCTTGTTGGATGAACTG-3’ |
| BDNF | Forward | 5’-CTTGACATCATTGGCTGACACTTTC-3’ |
| BDNF | Reverse | 5’-GGCACTTGACTACTGAGCATCAC-3’ |
| PIK3R1 | Forward | 5’-GAAGCAGCAACCGAAACAAAGC-3’ |
| PIK3R1 | Reverse | 5’-ACCACTACAGAGCAGGCATAGC-3’ |
| PLEK | Forward | 5’-TCTGTTAGGAATCGCCAGGAAGG-3’ |
| PLEK | Reverse | 5’-AGTAGTAGAAGGCATCAGGGTTGTC-3’ |
| RAC2 | Forward | 5’-GGACAGCAAGCCAGTGAACC-3’ |
| RAC2 | Reverse | 5’-TGACGAGGGAGAAGCAGATGAG-3’ |
| CCL2 | Forward | 5’-CAGCAGCAAGTGTCCCAAAGAAG-3’ |
| CCL2 | Reverse | 5’-TGCTTGTCCAGGTGGTCCATG-3’ |
| GAPDH | Forward | 5’-ACCCACTCCTCCACCTTTGAC-3’ |
| GAPDH | Reverse | 5’-TCCACCACCCTGTTGCTGTAG-3’ |

ANP: atrial natriuretic peptide; BNP: brain natriuretic peptide; β-MHC: β-myosin heavy chain; FOS: FBJ murine osteosarcoma viral oncogene homolog; CD86: cluster of differentiation 86; CD68: cluster of differentiation 68; BDNF: brain-derived neurotrophic factor; PIK3R1: phosphoinositide-3-kinase regulatory subunit 1; PLEK pleckstrin; RAC2: ras-related C3 botulinum toxin substrate 2; CCL2: C-C motif chemokine ligand 2; GAPDH: glyceraldehyde-3-phosphate dehydrogenase

**Supplementary Table 4**

GO enrichment analysis of DEGs.

| Ontology | | ID | Description | p.adjust | Count |
| --- | --- | --- | --- | --- | --- |
| BP | GO:0042110 | | T cell activation | 0.004001289 | 24 |
| BP | GO:0002683 | | negative regulation of immune system process | 0.004381825 | 23 |
| BP | GO:0034765 | | regulation of ion transmembrane transport | 0.006272829 | 23 |
| BP | GO:0022407 | | regulation of cell-cell adhesion | 0.004001289 | 22 |
| BP | GO:0051249 | | regulation of lymphocyte activation | 0.012904612 | 22 |
| BP | GO:0050867 | | positive regulation of cell activation | 0.004296604 | 21 |
| BP | GO:0002697 | | regulation of immune effector process | 0.025430864 | 20 |
| BP | GO:0050727 | | regulation of inflammatory response | 0.031485113 | 20 |
| BP | GO:0042692 | | muscle cell differentiation | 0.012904612 | 19 |
| BP | GO:0045785 | | positive regulation of cell adhesion | 0.01854752 | 19 |
| BP | GO:0060537 | | muscle tissue development | 0.020863723 | 19 |
| BP | GO:0007389 | | pattern specification process | 0.031485113 | 19 |
| BP | GO:0015711 | | organic anion transport | 0.047498053 | 19 |
| BP | GO:0051146 | | striated muscle cell differentiation | 0.004001289 | 18 |
| BP | GO:1903522 | | regulation of blood circulation | 0.004001289 | 18 |
| BP | GO:0050863 | | regulation of T cell activation | 0.005137338 | 18 |
| BP | GO:0007159 | | leukocyte cell-cell adhesion | 0.01013267 | 18 |
| BP | GO:0003002 | | regionalization | 0.012904612 | 18 |
| BP | GO:0002696 | | positive regulation of leukocyte activation | 0.023452527 | 18 |
| BP | GO:0014706 | | striated muscle tissue development | 0.025547955 | 18 |
| BP | GO:0006979 | | response to oxidative stress | 0.050350464 | 18 |
| BP | GO:0007409 | | axonogenesis | 0.059082706 | 18 |
| BP | GO:0072503 | | cellular divalent inorganic cation homeostasis | 0.078832166 | 18 |
| BP | GO:1903037 | | regulation of leukocyte cell-cell adhesion | 0.01013267 | 17 |
| BP | GO:0007178 | | transmembrane receptor protein serine/threonine kinase signaling pathway | 0.023728484 | 17 |
| BP | GO:0007517 | | muscle organ development | 0.048225551 | 17 |
| BP | GO:0023061 | | signal release | 0.081313921 | 17 |
| BP | GO:0001819 | | positive regulation of cytokine production | 0.081700342 | 17 |
| BP | GO:0003012 | | muscle system process | 0.082070319 | 17 |
| BP | GO:0055074 | | calcium ion homeostasis | 0.087310335 | 17 |
| BP | GO:1903706 | | regulation of hemopoiesis | 0.091420224 | 17 |
| BP | GO:0002283 | | neutrophil activation involved in immune response | 0.099194619 | 17 |
| BP | GO:0060047 | | heart contraction | 0.011254806 | 16 |
| BP | GO:0003015 | | heart process | 0.012904612 | 16 |
| BP | GO:0001666 | | response to hypoxia | 0.040150315 | 16 |
| BP | GO:0036293 | | response to decreased oxygen levels | 0.046970401 | 16 |
| BP | GO:0070482 | | response to oxygen levels | 0.059082706 | 16 |
| BP | GO:0019216 | | regulation of lipid metabolic process | 0.074268287 | 16 |
| BP | GO:0043062 | | extracellular structure organization | 0.081313921 | 16 |
| BP | GO:0008016 | | regulation of heart contraction | 0.011254806 | 15 |
| BP | GO:0043491 | | protein kinase B signaling | 0.016803404 | 15 |
| BP | GO:0032496 | | response to lipopolysaccharide | 0.043992985 | 15 |
| BP | GO:0051251 | | positive regulation of lymphocyte activation | 0.046731807 | 15 |
| BP | GO:0060070 | | canonical Wnt signaling pathway | 0.046970401 | 15 |
| BP | GO:0002237 | | response to molecule of bacterial origin | 0.050350464 | 15 |
| BP | GO:0030098 | | lymphocyte differentiation | 0.056960215 | 15 |
| BP | GO:0051480 | | regulation of cytosolic calcium ion concentration | 0.059082706 | 15 |
| BP | GO:0048545 | | response to steroid hormone | 0.081313921 | 15 |
| BP | GO:0008217 | | regulation of blood pressure | 0.004001289 | 14 |
| BP | GO:0042445 | | hormone metabolic process | 0.01301276 | 14 |
| BP | GO:0022409 | | positive regulation of cell-cell adhesion | 0.024716517 | 14 |
| BP | GO:1902105 | | regulation of leukocyte differentiation | 0.030509395 | 14 |
| BP | GO:0043270 | | positive regulation of ion transport | 0.031485113 | 14 |
| BP | GO:0001822 | | kidney development | 0.031851177 | 14 |
| BP | GO:0007162 | | negative regulation of cell adhesion | 0.039511163 | 14 |
| BP | GO:0090287 | | regulation of cellular response to growth factor stimulus | 0.04174156 | 14 |
| BP | GO:0072001 | | renal system development | 0.04218014 | 14 |
| BP | GO:1901214 | | regulation of neuron death | 0.054152931 | 14 |
| BP | GO:0060562 | | epithelial tube morphogenesis | 0.059082706 | 14 |
| BP | GO:0032103 | | positive regulation of response to external stimulus | 0.059920388 | 14 |
| BP | GO:0001655 | | urogenital system development | 0.070713606 | 14 |
| BP | GO:0015849 | | organic acid transport | 0.073295885 | 14 |
| BP | GO:0046942 | | carboxylic acid transport | 0.073295885 | 14 |
| BP | GO:0007596 | | blood coagulation | 0.074665008 | 14 |
| BP | GO:0007599 | | hemostasis | 0.078832166 | 14 |
| BP | GO:0050817 | | coagulation | 0.078832166 | 14 |
| BP | GO:1904062 | | regulation of cation transmembrane transport | 0.078832166 | 14 |
| BP | GO:0070997 | | neuron death | 0.081313921 | 14 |
| BP | GO:0043687 | | post-translational protein modification | 0.09192922 | 14 |
| BP | GO:0018108 | | peptidyl-tyrosine phosphorylation | 0.092256259 | 14 |
| BP | GO:0018212 | | peptidyl-tyrosine modification | 0.094569756 | 14 |
| BP | GO:0050870 | | positive regulation of T cell activation | 0.012904612 | 13 |
| BP | GO:1903039 | | positive regulation of leukocyte cell-cell adhesion | 0.022284118 | 13 |
| BP | GO:0051896 | | regulation of protein kinase B signaling | 0.031485113 | 13 |
| BP | GO:0090257 | | regulation of muscle system process | 0.04174156 | 13 |
| BP | GO:0022898 | | regulation of transmembrane transporter activity | 0.047613428 | 13 |
| BP | GO:0032409 | | regulation of transporter activity | 0.056960215 | 13 |
| BP | GO:0070661 | | leukocyte proliferation | 0.073295885 | 13 |
| BP | GO:0007204 | | positive regulation of cytosolic calcium ion concentration | 0.089058328 | 13 |
| BP | GO:0016485 | | protein processing | 0.094569756 | 13 |
| BP | GO:0071214 | | cellular response to abiotic stimulus | 0.099194619 | 13 |
| BP | GO:0104004 | | cellular response to environmental stimulus | 0.099194619 | 13 |
| BP | GO:0061337 | | cardiac conduction | 0.004929305 | 12 |
| BP | GO:0034764 | | positive regulation of transmembrane transport | 0.027016077 | 12 |
| BP | GO:0035637 | | multicellular organismal signaling | 0.027016077 | 12 |
| BP | GO:0002699 | | positive regulation of immune effector process | 0.031851177 | 12 |
| BP | GO:0045444 | | fat cell differentiation | 0.03889451 | 12 |
| BP | GO:0032412 | | regulation of ion transmembrane transporter activity | 0.071039032 | 12 |
| BP | GO:1901617 | | organic hydroxy compound biosynthetic process | 0.07975953 | 12 |
| BP | GO:0046651 | | lymphocyte proliferation | 0.081053919 | 12 |
| BP | GO:0061448 | | connective tissue development | 0.081313921 | 12 |
| BP | GO:0032943 | | mononuclear cell proliferation | 0.081313921 | 12 |
| BP | GO:0071356 | | cellular response to tumor necrosis factor | 0.094569756 | 12 |
| BP | GO:0071772 | | response to BMP | 0.025547955 | 11 |
| BP | GO:0071773 | | cellular response to BMP stimulus | 0.025547955 | 11 |
| BP | GO:0055002 | | striated muscle cell development | 0.027016077 | 11 |
| BP | GO:0051897 | | positive regulation of protein kinase B signaling | 0.028066623 | 11 |
| BP | GO:0055001 | | muscle cell development | 0.031851177 | 11 |
| BP | GO:0060541 | | respiratory system development | 0.043992985 | 11 |
| BP | GO:0031032 | | actomyosin structure organization | 0.043992985 | 11 |
| BP | GO:0050866 | | negative regulation of cell activation | 0.043992985 | 11 |
| BP | GO:0002703 | | regulation of leukocyte mediated immunity | 0.046731807 | 11 |
| BP | GO:1901215 | | negative regulation of neuron death | 0.050350464 | 11 |
| BP | GO:0030217 | | T cell differentiation | 0.081313921 | 11 |
| BP | GO:0071383 | | cellular response to steroid hormone stimulus | 0.091420224 | 11 |
| BP | GO:0051924 | | regulation of calcium ion transport | 0.094569756 | 11 |
| BP | GO:0090596 | | sensory organ morphogenesis | 0.096903814 | 11 |
| BP | GO:0003073 | | regulation of systemic arterial blood pressure | 0.004001289 | 10 |
| BP | GO:0046631 | | alpha-beta T cell activation | 0.023728484 | 10 |
| BP | GO:0044344 | | cellular response to fibroblast growth factor stimulus | 0.025561171 | 10 |
| BP | GO:0008277 | | regulation of G protein-coupled receptor signaling pathway | 0.029138564 | 10 |
| BP | GO:0071774 | | response to fibroblast growth factor | 0.029886564 | 10 |
| BP | GO:0034767 | | positive regulation of ion transmembrane transport | 0.031851177 | 10 |
| BP | GO:0030509 | | BMP signaling pathway | 0.031851177 | 10 |
| BP | GO:0030324 | | lung development | 0.047498053 | 10 |
| BP | GO:0046165 | | alcohol biosynthetic process | 0.049957384 | 10 |
| BP | GO:0030323 | | respiratory tube development | 0.050350464 | 10 |
| BP | GO:0022408 | | negative regulation of cell-cell adhesion | 0.055050811 | 10 |
| BP | GO:0042098 | | T cell proliferation | 0.056960215 | 10 |
| BP | GO:0048017 | | inositol lipid-mediated signaling | 0.056960215 | 10 |
| BP | GO:0043523 | | regulation of neuron apoptotic process | 0.087310335 | 10 |
| BP | GO:0010810 | | regulation of cell-substrate adhesion | 0.091420224 | 10 |
| BP | GO:0050920 | | regulation of chemotaxis | 0.092256259 | 10 |
| BP | GO:0071804 | | cellular potassium ion transport | 0.092256259 | 10 |
| BP | GO:0071805 | | potassium ion transmembrane transport | 0.092256259 | 10 |
| BP | GO:0009952 | | anterior/posterior pattern specification | 0.094569756 | 10 |
| BP | GO:0043583 | | ear development | 0.094569756 | 10 |
| BP | GO:0070663 | | regulation of leukocyte proliferation | 0.099194619 | 10 |
| BP | GO:0002576 | | platelet degranulation | 0.031851177 | 9 |
| BP | GO:0043524 | | negative regulation of neuron apoptotic process | 0.050350464 | 9 |
| BP | GO:1903169 | | regulation of calcium ion transmembrane transport | 0.055050811 | 9 |
| BP | GO:0050729 | | positive regulation of inflammatory response | 0.056960215 | 9 |
| BP | GO:1903707 | | negative regulation of hemopoiesis | 0.059082706 | 9 |
| BP | GO:0007519 | | skeletal muscle tissue development | 0.068475303 | 9 |
| BP | GO:0046661 | | male sex differentiation | 0.068475303 | 9 |
| BP | GO:0045619 | | regulation of lymphocyte differentiation | 0.078832166 | 9 |
| BP | GO:0060538 | | skeletal muscle organ development | 0.078832166 | 9 |
| BP | GO:0006937 | | regulation of muscle contraction | 0.081313921 | 9 |
| BP | GO:0006941 | | striated muscle contraction | 0.081700342 | 9 |
| BP | GO:0002695 | | negative regulation of leukocyte activation | 0.083820032 | 9 |
| BP | GO:0048015 | | phosphatidylinositol-mediated signaling | 0.091420224 | 9 |
| BP | GO:0061138 | | morphogenesis of a branching epithelium | 0.092256259 | 9 |
| BP | GO:0043409 | | negative regulation of MAPK cascade | 0.093170143 | 9 |
| BP | GO:0044070 | | regulation of anion transport | 0.027016077 | 8 |
| BP | GO:0060191 | | regulation of lipase activity | 0.029886564 | 8 |
| BP | GO:0014066 | | regulation of phosphatidylinositol 3-kinase signaling | 0.056960215 | 8 |
| BP | GO:0002705 | | positive regulation of leukocyte mediated immunity | 0.073295885 | 8 |
| BP | GO:0060048 | | cardiac muscle contraction | 0.078832166 | 8 |
| BP | GO:0045580 | | regulation of T cell differentiation | 0.07975953 | 8 |
| BP | GO:0051588 | | regulation of neurotransmitter transport | 0.07975953 | 8 |
| BP | GO:0072006 | | nephron development | 0.081700342 | 8 |
| BP | GO:1904064 | | positive regulation of cation transmembrane transport | 0.085485943 | 8 |
| BP | GO:0006865 | | amino acid transport | 0.087310335 | 8 |
| BP | GO:0051250 | | negative regulation of lymphocyte activation | 0.087427411 | 8 |
| BP | GO:0014065 | | phosphatidylinositol 3-kinase signaling | 0.091420224 | 8 |
| BP | GO:0016331 | | morphogenesis of embryonic epithelium | 0.092256259 | 8 |
| BP | GO:0048754 | | branching morphogenesis of an epithelial tube | 0.092256259 | 8 |
| BP | GO:0015800 | | acidic amino acid transport | 0.023711377 | 7 |
| BP | GO:1902930 | | regulation of alcohol biosynthetic process | 0.036236415 | 7 |
| BP | GO:0046634 | | regulation of alpha-beta T cell activation | 0.053051541 | 7 |
| BP | GO:0006835 | | dicarboxylic acid transport | 0.056960215 | 7 |
| BP | GO:2000379 | | positive regulation of reactive oxygen species metabolic process | 0.068705851 | 7 |
| BP | GO:1902106 | | negative regulation of leukocyte differentiation | 0.071039032 | 7 |
| BP | GO:0010927 | | cellular component assembly involved in morphogenesis | 0.087310335 | 7 |
| BP | GO:0043500 | | muscle adaptation | 0.096903814 | 7 |
| BP | GO:0002062 | | chondrocyte differentiation | 0.099194619 | 7 |
| BP | GO:0003044 | | regulation of systemic arterial blood pressure mediated by a chemical signal | 0.025547955 | 6 |
| BP | GO:0002886 | | regulation of myeloid leukocyte mediated immunity | 0.031485113 | 6 |
| BP | GO:0010517 | | regulation of phospholipase activity | 0.055050811 | 6 |
| BP | GO:0030239 | | myofibril assembly | 0.059082706 | 6 |
| BP | GO:0043407 | | negative regulation of MAP kinase activity | 0.073295885 | 6 |
| BP | GO:0030193 | | regulation of blood coagulation | 0.074974685 | 6 |
| BP | GO:1900046 | | regulation of hemostasis | 0.078832166 | 6 |
| BP | GO:0050818 | | regulation of coagulation | 0.081313921 | 6 |
| BP | GO:0055013 | | cardiac muscle cell development | 0.091420224 | 6 |
| BP | GO:1901019 | | regulation of calcium ion transmembrane transporter activity | 0.091420224 | 6 |
| BP | GO:0030901 | | midbrain development | 0.092256259 | 6 |
| BP | GO:0014909 | | smooth muscle cell migration | 0.093170143 | 6 |
| BP | GO:0030510 | | regulation of BMP signaling pathway | 0.093170143 | 6 |
| BP | GO:0045638 | | negative regulation of myeloid cell differentiation | 0.093170143 | 6 |
| BP | GO:0010092 | | specification of animal organ identity | 0.027016077 | 5 |
| BP | GO:0051955 | | regulation of amino acid transport | 0.027016077 | 5 |
| BP | GO:0071542 | | dopaminergic neuron differentiation | 0.031851177 | 5 |
| BP | GO:0001990 | | regulation of systemic arterial blood pressure by hormone | 0.039511163 | 5 |
| BP | GO:0051154 | | negative regulation of striated muscle cell differentiation | 0.043992985 | 5 |
| BP | GO:0071825 | | protein-lipid complex subunit organization | 0.05812595 | 5 |
| BP | GO:0060425 | | lung morphogenesis | 0.059082706 | 5 |
| BP | GO:0030195 | | negative regulation of blood coagulation | 0.071513702 | 5 |
| BP | GO:0045214 | | sarcomere organization | 0.071513702 | 5 |
| BP | GO:1900047 | | negative regulation of hemostasis | 0.073295885 | 5 |
| BP | GO:0042743 | | hydrogen peroxide metabolic process | 0.07975953 | 5 |
| BP | GO:0050819 | | negative regulation of coagulation | 0.07975953 | 5 |
| BP | GO:0019229 | | regulation of vasoconstriction | 0.081313921 | 5 |
| BP | GO:0010518 | | positive regulation of phospholipase activity | 0.081700342 | 5 |
| BP | GO:0032890 | | regulation of organic acid transport | 0.081700342 | 5 |
| BP | GO:0045576 | | mast cell activation | 0.085515869 | 5 |
| BP | GO:0048645 | | animal organ formation | 0.087310335 | 5 |
| BP | GO:0007585 | | respiratory gaseous exchange | 0.091376377 | 5 |
| BP | GO:0046635 | | positive regulation of alpha-beta T cell activation | 0.091376377 | 5 |
| BP | GO:1901862 | | negative regulation of muscle tissue development | 0.091376377 | 5 |
| BP | GO:0046637 | | regulation of alpha-beta T cell differentiation | 0.09192922 | 5 |
| BP | GO:0045670 | | regulation of osteoclast differentiation | 0.093170143 | 5 |
| BP | GO:0051148 | | negative regulation of muscle cell differentiation | 0.09488715 | 5 |
| BP | GO:0070262 | | peptidyl-serine dephosphorylation | 0.030955322 | 4 |
| BP | GO:0010310 | | regulation of hydrogen peroxide metabolic process | 0.031851177 | 4 |
| BP | GO:0001759 | | organ induction | 0.035191267 | 4 |
| BP | GO:0003081 | | regulation of systemic arterial blood pressure by renin-angiotensin | 0.048225551 | 4 |
| BP | GO:0045671 | | negative regulation of osteoclast differentiation | 0.050350464 | 4 |
| BP | GO:0098810 | | neurotransmitter reuptake | 0.050350464 | 4 |
| BP | GO:0008045 | | motor neuron axon guidance | 0.054152931 | 4 |
| BP | GO:0034368 | | protein-lipid complex remodeling | 0.054152931 | 4 |
| BP | GO:0034369 | | plasma lipoprotein particle remodeling | 0.054152931 | 4 |
| BP | GO:0034367 | | protein-containing complex remodeling | 0.056960215 | 4 |
| BP | GO:0010743 | | regulation of macrophage derived foam cell differentiation | 0.059082706 | 4 |
| BP | GO:0045940 | | positive regulation of steroid metabolic process | 0.059082706 | 4 |
| BP | GO:0016486 | | peptide hormone processing | 0.073295885 | 4 |
| BP | GO:0046633 | | alpha-beta T cell proliferation | 0.073295885 | 4 |
| BP | GO:0031128 | | developmental induction | 0.078832166 | 4 |
| BP | GO:0010742 | | macrophage derived foam cell differentiation | 0.081313921 | 4 |
| BP | GO:0030947 | | regulation of vascular endothelial growth factor receptor signaling pathway | 0.081313921 | 4 |
| BP | GO:0090077 | | foam cell differentiation | 0.081313921 | 4 |
| BP | GO:0003156 | | regulation of animal organ formation | 0.083820032 | 4 |
| BP | GO:0032350 | | regulation of hormone metabolic process | 0.087310335 | 4 |
| BP | GO:0048009 | | insulin-like growth factor receptor signaling pathway | 0.087310335 | 4 |
| BP | GO:0086091 | | regulation of heart rate by cardiac conduction | 0.087310335 | 4 |
| BP | GO:0001709 | | cell fate determination | 0.092256259 | 4 |
| BP | GO:0051281 | | positive regulation of release of sequestered calcium ion into cytosol | 0.092256259 | 4 |
| BP | GO:0001768 | | establishment of T cell polarity | 0.037551227 | 3 |
| BP | GO:0001767 | | establishment of lymphocyte polarity | 0.043992985 | 3 |
| BP | GO:0002002 | | regulation of angiotensin levels in blood | 0.048225551 | 3 |
| BP | GO:0002003 | | angiotensin maturation | 0.048225551 | 3 |
| BP | GO:0038180 | | nerve growth factor signaling pathway | 0.048225551 | 3 |
| BP | GO:0010872 | | regulation of cholesterol esterification | 0.054152931 | 3 |
| BP | GO:0034374 | | low-density lipoprotein particle remodeling | 0.054152931 | 3 |
| BP | GO:0010885 | | regulation of cholesterol storage | 0.073295885 | 3 |
| BP | GO:0006590 | | thyroid hormone generation | 0.078832166 | 3 |
| BP | GO:0034433 | | steroid esterification | 0.078832166 | 3 |
| BP | GO:0034434 | | sterol esterification | 0.078832166 | 3 |
| BP | GO:0034435 | | cholesterol esterification | 0.078832166 | 3 |
| BP | GO:1902931 | | negative regulation of alcohol biosynthetic process | 0.078832166 | 3 |
| BP | GO:1904948 | | midbrain dopaminergic neuron differentiation | 0.078832166 | 3 |
| BP | GO:0010832 | | negative regulation of myotube differentiation | 0.081313921 | 3 |
| BP | GO:0010878 | | cholesterol storage | 0.081313921 | 3 |
| BP | GO:0048557 | | embryonic digestive tract morphogenesis | 0.081313921 | 3 |
| BP | GO:0001991 | | regulation of systemic arterial blood pressure by circulatory renin-angiotensin | 0.087310335 | 3 |
| BP | GO:0030949 | | positive regulation of vascular endothelial growth factor receptor signaling pathway | 0.087310335 | 3 |
| BP | GO:0033194 | | response to hydroperoxide | 0.091420224 | 3 |
| BP | GO:0042053 | | regulation of dopamine metabolic process | 0.091420224 | 3 |
| BP | GO:0042069 | | regulation of catecholamine metabolic process | 0.091420224 | 3 |
| BP | GO:0051580 | | regulation of neurotransmitter uptake | 0.091420224 | 3 |
| BP | GO:0097503 | | sialylation | 0.091420224 | 3 |
| BP | GO:0042403 | | thyroid hormone metabolic process | 0.094569756 | 3 |
| CC | GO:0062023 | | collagen-containing extracellular matrix | 8.68E-05 | 24 |
| CC | GO:0098793 | | presynapse | 0.087417333 | 18 |
| CC | GO:1990351 | | transporter complex | 0.065551102 | 15 |
| CC | GO:0005788 | | endoplasmic reticulum lumen | 0.065551102 | 14 |
| CC | GO:1902495 | | transmembrane transporter complex | 0.078972196 | 14 |
| CC | GO:0031253 | | cell projection membrane | 0.096915686 | 14 |
| CC | GO:0034702 | | ion channel complex | 0.087417333 | 13 |
| CC | GO:0072562 | | blood microparticle | 0.065551102 | 9 |
| CC | GO:0031091 | | platelet alpha granule | 0.038884198 | 8 |
| CC | GO:0030018 | | Z disc | 0.087417333 | 8 |
| CC | GO:0005581 | | collagen trimer | 0.065551102 | 7 |
| CC | GO:0031093 | | platelet alpha granule lumen | 0.065551102 | 6 |
| CC | GO:0048786 | | presynaptic active zone | 0.076208699 | 6 |
| MF | GO:0048018 | | receptor ligand activity | 0.061586666 | 19 |
| MF | GO:0001228 | | DNA-binding transcription activator activity, RNA polymerase II-specific | 0.055847266 | 18 |
| MF | GO:0001664 | | G protein-coupled receptor binding | 0.021856258 | 16 |
| MF | GO:1901681 | | sulfur compound binding | 0.024302687 | 14 |
| MF | GO:0005126 | | cytokine receptor binding | 0.046711005 | 14 |
| MF | GO:0070851 | | growth factor receptor binding | 0.021856258 | 11 |
| MF | GO:0005201 | | extracellular matrix structural constituent | 0.024302687 | 11 |
| MF | GO:0008083 | | growth factor activity | 0.024302687 | 11 |
| MF | GO:0008201 | | heparin binding | 0.024302687 | 11 |
| MF | GO:0019838 | | growth factor binding | 0.046711005 | 9 |
| MF | GO:0004197 | | cysteine-type endopeptidase activity | 0.055847266 | 8 |
| MF | GO:0005507 | | copper ion binding | 0.04635569 | 6 |
| MF | GO:0005548 | | phospholipid transporter activity | 0.086324032 | 5 |
| MF | GO:0017127 | | cholesterol transporter activity | 0.024302687 | 4 |
| MF | GO:0120020 | | intermembrane cholesterol transfer activity | 0.024302687 | 4 |
| MF | GO:0120015 | | intermembrane sterol transfer activity | 0.024302687 | 4 |
| MF | GO:0120013 | | intermembrane lipid transfer activity | 0.046711005 | 4 |
| MF | GO:0005104 | | fibroblast growth factor receptor binding | 0.046711005 | 4 |
| MF | GO:0015248 | | sterol transporter activity | 0.082813038 | 4 |
| MF | GO:0031420 | | alkali metal ion binding | 0.089633104 | 3 |

GO: Gene Ontology; DEGs: differently expressed genes; BP: biological process; CC: cellular component; MF: molecular function.

**Supplementary Table 5**

KEGG enrichment analysis of DEGs.

| Ontology | ID | Description | p.adjust | Count |
| --- | --- | --- | --- | --- |
| KEGG | hsa04010 | MAPK signaling pathway | 0.000511 | 20 |
| KEGG | hsa04550 | Signaling pathways regulating pluripotency of stem cells | 0.014622 | 11 |
| KEGG | hsa05226 | Gastric cancer | 0.014622 | 11 |
| KEGG | hsa04151 | PI3K-Akt signaling pathway | 0.014622 | 18 |
| KEGG | hsa04610 | Complement and coagulation cascades | 0.014622 | 8 |
| KEGG | hsa04015 | Rap1 signaling pathway | 0.014622 | 13 |
| KEGG | hsa05418 | Fluid shear stress and atherosclerosis | 0.019054 | 10 |
| KEGG | hsa05224 | Breast cancer | 0.025041 | 10 |
| KEGG | hsa04014 | Ras signaling pathway | 0.025041 | 13 |
| KEGG | hsa04614 | Renin-angiotensin system | 0.025041 | 4 |
| KEGG | hsa05142 | Chagas disease | 0.025041 | 8 |
| KEGG | hsa04390 | Hippo signaling pathway | 0.028521 | 10 |
| KEGG | hsa04062 | Chemokine signaling pathway | 0.034186 | 11 |
| KEGG | hsa05135 | Yersinia infection | 0.034186 | 9 |
| KEGG | hsa05205 | Proteoglycans in cancer | 0.05213 | 11 |
| KEGG | hsa05218 | Melanoma | 0.052953 | 6 |
| KEGG | hsa04713 | Circadian entrainment | 0.052953 | 7 |
| KEGG | hsa05133 | Pertussis | 0.059328 | 6 |
| KEGG | hsa04024 | cAMP signaling pathway | 0.059328 | 11 |
| KEGG | hsa05140 | Leishmaniasis | 0.059328 | 6 |
| KEGG | hsa04810 | Regulation of actin cytoskeleton | 0.059328 | 11 |
| KEGG | hsa04310 | Wnt signaling pathway | 0.06146 | 9 |
| KEGG | hsa05134 | Legionellosis | 0.064755 | 5 |

KEGG: Kyoto Encyclopedia of Genes and Genomes; DEGs: differentially expressed genes.
